# Supplementary material for: Species-Specific Cuticular Phenotypes in Eutardigrada: A Morphometric Approach to Analyze the Variation of Star-Shaped Pores in Minibiotus Species
Source: MDPI journal article supplement (doi:10.3390/d13070307), 2021-07-07
Supplement: s1 [file s1]

## Supplementary material

# Species-specific cuticular phenotypes in Eutardigrada: a morphometric approach to analyze the variation of star shaped pores in *Minibiotus* species.

Alba Dueñas-Cedillo <sup>1,2</sup>, Jazmín García-Román <sup>1,2</sup>, Enrico Alejandro Ruiz <sup>1,\*</sup>, and Francisco Armendáriz-Toledano <sup>2,\*</sup>

- 1 Laboratorio de Ecología, Departamento de Zoología, Escuela Nacional de Ciencias Biológicas, Instituto Politécnico Nacional. Prolongación de Carpio y Plan de Ayala s/n. C.P. 11340. Ciudad de México, México; [aduenasc1600@alumno.ipn.mx](mailto:aduenasc1600@alumno.ipn.mx), [lgarcia0706@alumno.ipn.mx](mailto:lgarcia0706@alumno.ipn.mx), [eruizc@ipn.mx](mailto:eruizc@ipn.mx).
  - 2 Colección Nacional de Insectos, Departamento de Zoología, Instituto de Biología, Universidad Nacional Autónoma de México, Cto. Zona Deportiva S/N, C.U., C. P. 04510, Ciudad de México, México; [farmendariztoledano@ib.unam.mx](mailto:farmendariztoledano@ib.unam.mx)
- \* Correspondence: E.A.R. [eruizc@ipn.mx](mailto:eruizc@ipn.mx), F.A-T. [farmendariztoledano@ib.unam.mx](mailto:farmendariztoledano@ib.unam.mx),

**Table S1.** Linear regression of all morphometric traits measured of the star-shaped pored of *Minibiotus citlalium* in relation to buccal tube length (BTL). Data log–log transformed. N = sample size, b = slope, a\* = intercept,  $r^2$  = coefficient of correlation,  $t = (b)1/SE$  of b, p = probability that b differs from slope of 1. Traits with  $p < 0.05$  are allometric and are indicated in bold.

| Trait                       | N  | b      | a*     | $r^2$ | $p(r^2)$     | t      | p (t)        |
|-----------------------------|----|--------|--------|-------|--------------|--------|--------------|
| Diameter of disc area (DDA) | 24 | 0.608  | -0.784 | 0.005 | 0.732        | -0.223 | 0.825        |
| Diameter of arm area (DAA)  | 24 | 1.030  | -1.217 | 0.014 | 0.576        | 0.016  | 0.987        |
| DAA/DDA                     | 24 | 0.421  | -0.434 | 0.018 | 0.528        | -0.881 | 0.388        |
| Average arm length (AAL)    | 24 | -2.218 | 2.733  | 0.155 | <b>0.057</b> | -2.917 | <b>0.008</b> |
| Average arm width (AAW)     | 24 | -2.867 | 3.899  | 0.239 | <b>0.015</b> | -3.545 | <b>0.002</b> |
| AAW/AAL                     | 24 | -0.649 | 1.166  | 0.031 | 0.414        | -2.117 | <b>0.046</b> |

**Table S2.** Linear regression of all morphometric traits measured of the star-shaped pores of *Minibiotus sidereus* in relation to buccal tube length (BTL). Data log–log transformed. N = sample size, b = slope, a\*= intercept,  $r^2$  = coefficient of correlation,  $t = (b-1)/SE$  of b, p = probability that b differs from slope of 1. Traits with  $p < 0.05$  are allometric and are indicated in bold.

| Trait                                | N  | b       | a*     | $r^2$ | $p(r^2)$     | t      | p (t)        |
|--------------------------------------|----|---------|--------|-------|--------------|--------|--------------|
| Diameter of disc area ( <b>DDA</b> ) | 34 | 0.499   | -0.612 | 0.057 | 0.173        | -1.401 | 0.171        |
| Diameter of arm area ( <b>DAA</b> )  | 34 | 0.389   | -0.104 | 0.038 | 0.267        | -1.777 | 0.085        |
| <b>DAA/DDA</b>                       | 34 | -0.110  | 0.507  | 0.004 | 0.732        | -3.491 | <b>0.001</b> |
| Average arm length ( <b>AAL</b> )    | 34 | -8.799  | 12.261 | 0.186 | <b>0.011</b> | -3.007 | <b>0.005</b> |
| Average arm width ( <b>AAW</b> )     | 34 | -10.435 | 14.572 | 0.238 | <b>0.003</b> | -3.462 | <b>0.002</b> |
| <b>AAW/AAL</b>                       | 34 | -1.636  | 2.311  | 0.310 | <b>0.001</b> | -6.116 | <b>0.000</b> |
